# Supplementary material for: Projections of Extreme Temperature–Related Deaths in the US
Source: PubMed Central journal article supplement (PMC11415784; doi:10.1001/jamanetworkopen.2024.34942), 2024-09-20
Supplement: jamanetwopen-e2434942-s002.pdf [file jamanetwopen-e2434942-s002.pdf]

## Data Sharing Statement

Khatana. Projections of Extreme Temperature–Related Deaths in the US. *JAMA Netw Open*.  
Published September 20, 2024. doi:10.1001/jamanetworkopen.2024.34942

### Data

**Data available:** No

### Additional Information

**Explanation for why data not available:** Individual level mortality data obtained from the National Center for Health Statistics under agreement and cannot be shared by the authors.
